# Supplementary material
Source: Springer Nature journal article supplement (https://www.springermedizin.de/resource/supplementary/12885_2012_3726_MOESM2_ESM.pdf/9465944)
Supplement: MOESM2 [file 9465944]

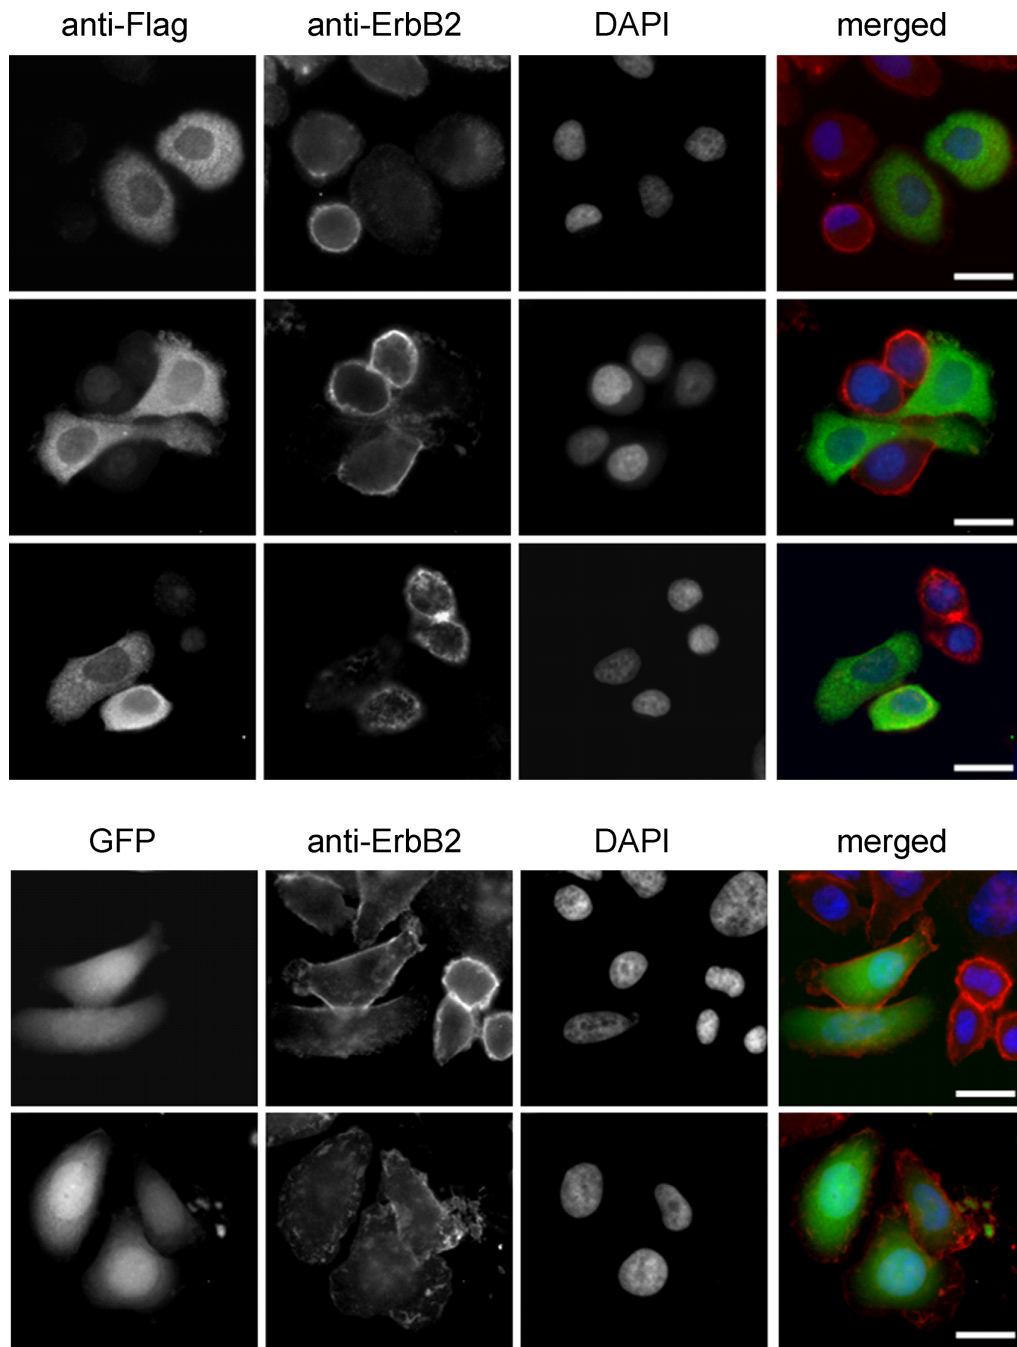

**Figure S1.** Immunofluorescence microscopy images showing intracellular localization of endogenous ErbB2 and either ectopically expressed MBP-1 or GFP protein. Human SKBr3 cancer cells transiently expressing either Flag-MBP-1 or GFP protein (upper and lower panels, respectively) were fixed, permeabilized and double-stained with anti-ErbB2 and anti-Flag antibody or single-stained with anti-ErbB2, as indicated. Nuclei were stained with DAPI. Spatial distribution was visualized by light microscopy as described in Materials and Methods. The colour merged images show the loss of ErbB2 membrane staining in MBP-1-expressing cells (upper panel). Scale bar, 25  $\mu$ m.
